# Supplementary material
Source: MDPI journal article supplement (https://www.mdpi.com/2673-8007/3/4/87)
Supplement: s1 [file s1]

## Supplemental Figures

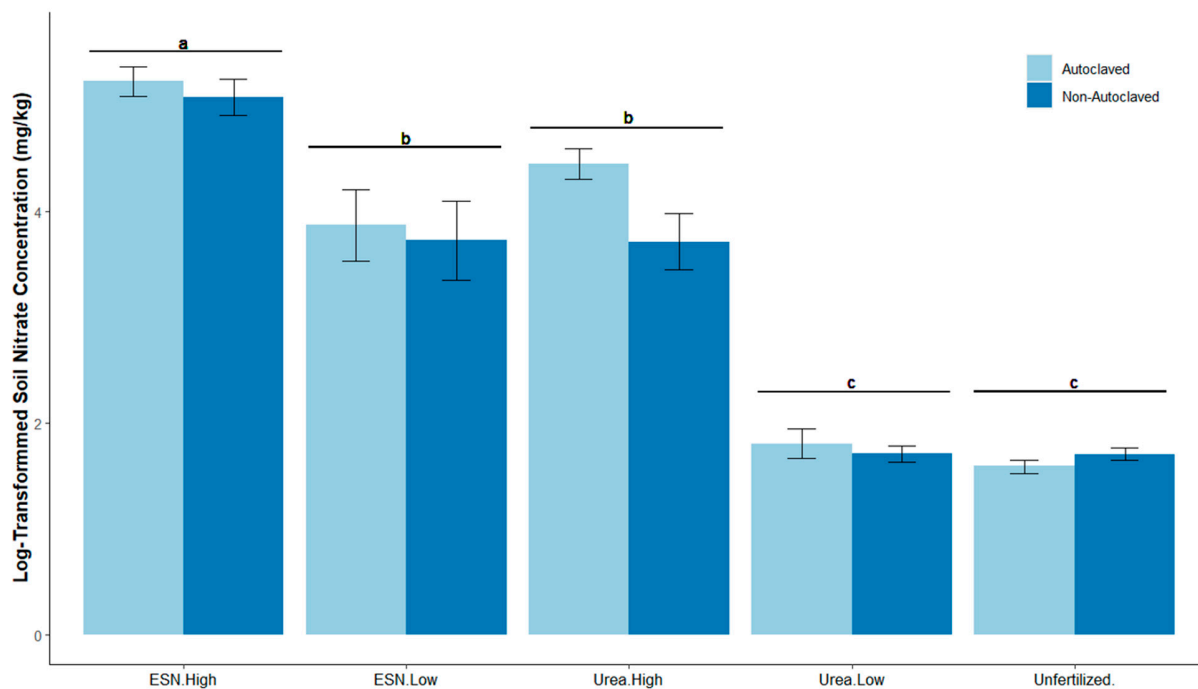

**Supplementary Figure S1.** Nitrate-N Concentration in Soils without a Plant. Presented as mean  $\pm$  SE. Different colored bars represent soil sterilization: autoclave-sterilized (light blue) and non-autoclave-sterilized (dark blue). An analysis of variance (ANOVA) was performed with a Tukey HSD test for means testing. Different letters denote significant difference at  $\alpha = 0.05$ .
